# Supplementary material
Source: PubMed Central journal article supplement (PMC2532561)
Supplement: NIHMS64018-supplement-1si20060101_12.pdf [file NIHMS64018-supplement-1si20060101_12.pdf]

## The Dehydratase Activity of Lactacin 481 Synthetase is Highly Processive

Leah M. Miller, Champak Chatterjee, Wilfred A. van der Donk  
and Neil L. Kelleher\*

Department of Chemistry, University of Illinois at Urbana-Champaign,  
Urbana, Illinois 61801.

### Supporting Information

#### *Generation of Enzyme and Substrate*

Enzyme and wild-type substrate were prepared as previously described.<sup>1</sup> Isotopically depleted LctA was grown in modified M9 minimal media.<sup>2</sup> BL21(DE3) cells containing the pET15b-LctA plasmid were grown overnight at 37 °C in LB containing ampicillin (100 µg/mL). After spinning down the cells, the supernatant was discarded and the cells were washed with 5 mL of wash buffer (3 g KH<sub>2</sub>PO<sub>4</sub>, 6 g Na<sub>2</sub>HPO<sub>4</sub>, 0.5 g NaCl per liter, pH 7.4). Following washing, the cells were resuspended in 2 mL of wash buffer and added to 300 mL of modified M9 minimal media. Modified M9 minimal media contained 30 mL of a 10X stock of minimal media (15 g KH<sub>2</sub>PO<sub>4</sub>, 30 g Na<sub>2</sub>HPO<sub>4</sub>, 2.5 g NaCl in 500 mL, pH 7.4), 0.8 mL of 40% (<sup>14</sup>NH<sub>4</sub>)<sub>2</sub>SO<sub>4</sub> (Sigma-Aldrich), 0.55 g of <sup>13</sup>C-depleted glucose (Cambridge Isotope Laboratories), 0.2 mg of FeSO<sub>4</sub>, 20 µg thiamine, 400 µL of 1 M MgSO<sub>4</sub>, 20 µL of 1 M CaCl<sub>2</sub>, 50 µg/mL ampicillin and 150 µL of a trace element solution containing 0.55g CaCl<sub>2</sub>, 0.17 g ZnCl<sub>2</sub>, 0.044 g CuCl<sub>2</sub>•H<sub>2</sub>O, 0.06 g CoCl<sub>2</sub>•6H<sub>2</sub>O, 0.06 g Na<sub>2</sub>MoO<sub>4</sub>•2H<sub>2</sub>O in 1 L at pH 7.4. The cells were induced at OD<sub>600</sub> = 0.7 by the addition of IPTG to a final concentration of 0.7 mM and grown for an additional 6 h at 37 °C before harvesting. The cell pellet (~2 g) was resuspended in 6 mL of start buffer 2 (20 mM Na<sub>2</sub>HPO<sub>4</sub>, pH 7.5, 500 mM NaCl, 0.5 mM imidazole). The cells were lysed by sonication and then centrifuged. The resulting pellet was resuspended in 6 mL of denaturing buffer (start buffer 2 with 6 M guanidine hydrochloride) and then sonicated again to redissolve the protein. The remaining insoluble material was pelleted by centrifugation following which the supernatant was mixed with Ni-NTA resin at 4 °C for 3 h. The resin mixture was loaded onto a column. After allowing the column to drain, the resin was washed with 50 mL of start buffer 2 (with 6 M guanidine hydrochloride) followed by a wash with 50 mL of wash buffer (20 mM Na<sub>2</sub>HPO<sub>4</sub>, pH 7.5, 300 mM NaCl, 30 mM imidazole, 4 M guanidine hydrochloride). The peptide was eluted four times with 5 mL of elute buffer (20 mM Na<sub>2</sub>HPO<sub>4</sub>, pH 7.5, 1 M NaCl, 50 mM EDTA). The samples containing isotopically depleted LctA were dried on a speed-vac and then resuspended in H<sub>2</sub>O containing 0.1% TFA before being injected onto an analytical C4 column. The peptide eluted at 19.4 min with a gradient of 2-100% B over 40 min (B = CH<sub>3</sub>CN/0.1% TFA).

#### *Instrumentation*

All data was acquired on a custom-built 8.5 T Quadrupole-FTMS.<sup>3</sup> Samples were introduced via automated nanospray (NanoMate 100, Advion BioSciences) into the instrument. A series of ion optics were used to direct the ions into the trapped ion cell of the Q-FTMS. A quadrupole in front of the cell could be used in mass selection mode to selectively enhance the ions in a window ~50 *m/z* in width. For MS/MS experiments, the ions of interest were isolated in the FTMS cell using a stored waveform inverse Fourier transform (SWIFT; window size ~1 *m/z*), then subsequently irradiated with a 75 W CO<sub>2</sub>

laser for 100-200 ms.<sup>4</sup> Data was acquired using a MIDAS data station. The fragment ion prediction program of the ProSight PTM software bundle was used to generate fragment ion masses (<https://prosigthptm.scs.uiuc.edu>).

### ***Time Course of Conversion LctA (natural isotopic abundance) to Product***

Assays with 11  $\mu\text{M}$  LctA (natural isotopic abundance), in buffer containing 50 mM Tris-HCl, pH 7.5, 10 mM  $\text{MgCl}_2$ , 0.5 mM ATP, 0.5  $\mu\text{M}$   $\text{ZnCl}_2$  and 25  $\mu\text{g/mL}$  BSA were incubated at 25  $^\circ\text{C}$  with His<sub>6</sub>-LctM at a final concentration of 0.19  $\mu\text{M}$ . The assays were quenched by filtering through a 0.45  $\mu\text{m}$  membrane into 5  $\mu\text{L}$  TFA or 20 mg TCEP after 15 s, 45 s, 75 s and 5 min. The samples were then purified on a C4 analytical HPLC column (the samples with TCEP were incubated for 20 min at 25  $^\circ\text{C}$  prior to HPLC analysis). The fractions were then dried down and resuspended in 30  $\mu\text{L}$  49%  $\text{CH}_3\text{CN}$ , 49%  $\text{H}_2\text{O}$  and 2% acetic acid for FTMS analysis. The results are shown in Figure S1.

Complete conversion to product is observed after 5 min. Also, evidence for species containing 2-4 dehydrations are observed after 15 and 45 s. The 75 s time point shows species that may be a mixture of 2 and 3 dehydrations along with oxidations of the -4  $\text{H}_2\text{O}$  species. Using depleted LctA allows for distinct identification of dehydrated species versus species with oxidations (a 2 Da difference). Figure S2 shows the isotopic distributions for LctA with the natural abundance of isotopes and LctA expressed in  $^{13}\text{C}$  and  $^{15}\text{N}$  depleted media.

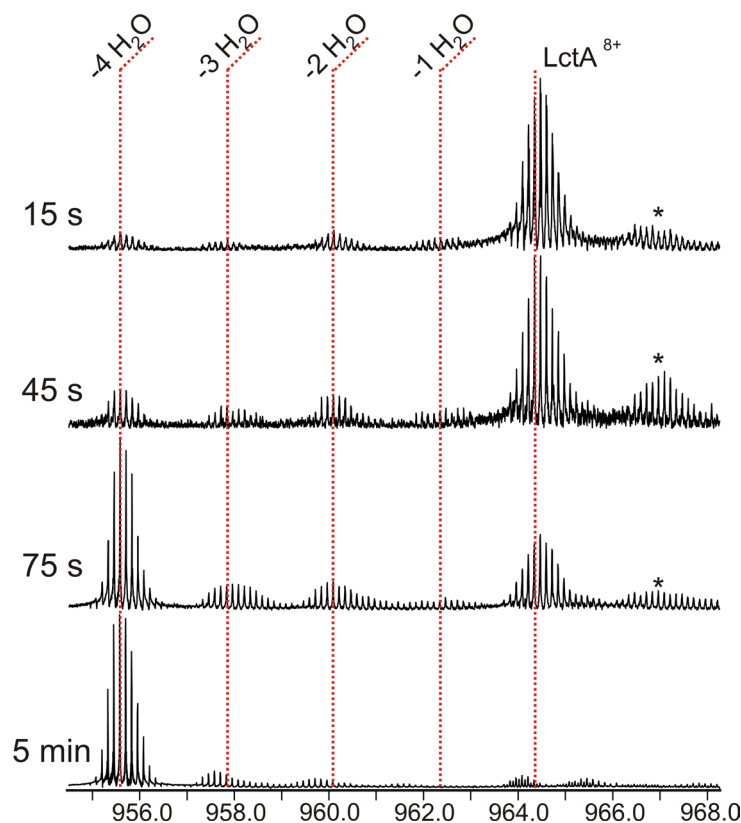

**Figure S1.** Time course with natural abundance LctA with an enzyme:substrate ratio of 1:60. An \* denotes an adduct (oxidation or sodium).

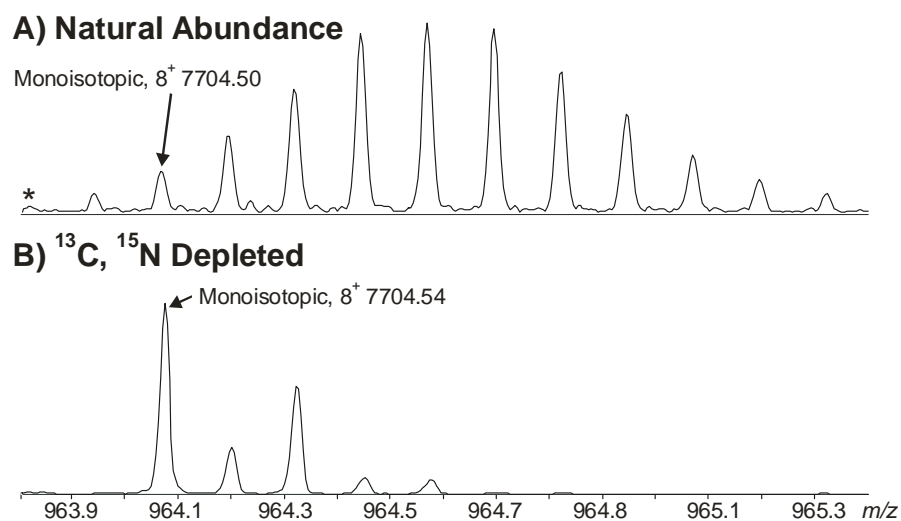

**Figure S2.** A) The isotopic distribution for natural abundance LctA (8+ charge state). An \* indicates the monoisotopic peak for the starting material containing a disulfide, which is 2 Da lower. B) The 8+ charge state for <sup>13</sup>C, <sup>15</sup>N depleted LctA. In both panels the monoisotopic peak is labeled.

### ***Assays with LctM and ATP***

HPLC purified (C4 column) isotope depleted LctA was redissolved in sterile Millipore water to a final concentration of 4 mg/mL (520 μM) as determined by the Bradford assay. The assays with LctM were carried out in a buffer containing 50 mM Tris-HCl, pH 7.5, 10 mM MgCl<sub>2</sub>, 5 mM DTT, 0.5 μM ZnCl<sub>2</sub> and 25 μg/mL BSA (Sigma, St. Louis, MO). The substrate, enzyme and ATP concentrations were varied as discussed below. All assays were performed at 25 °C. After quenching, each reaction mixture was loaded onto a pre-equilibrated C18 ZipTip, washed with H<sub>2</sub>O/0.1% TFA, and eluted into 4 μL 78% CH<sub>3</sub>CN, 20% H<sub>2</sub>O and 2% acetic acid and then diluted with 30 μL of 49% CH<sub>3</sub>CN, 49% H<sub>2</sub>O and 2% acetic acid prior to nanospray and FTMS analysis.

### ***Time Course of Conversion of <sup>13</sup>C, <sup>15</sup>N Depleted LctA to Product***

#### ***1:1 Enzyme to Substrate***

A chemical quench-flow apparatus (Model RQF-3, KinTek Corporation, Austin, TX) was used to obtain the initial time points (50 and 500 ms). An aliquot of 100 μL of a reaction mixture containing 5.2 μM <sup>13</sup>C, <sup>15</sup>N depleted LctA in the buffer described above with 5 mM ATP (final reaction concentration) was loaded into the first reaction loop and a sample of 100 μL of solution containing 5.2 μM His<sub>6</sub>-LctM was loaded into the second. Approximately 100 μL of a 5% TFA solution was used to quench the reactions, giving a final reaction volume of ~300 μL. The final enzyme to substrate ratio for each reaction was 1:1.

For longer time points, His<sub>6</sub>-LctM was added to a final concentration of 2.6 μM to a reaction mixture containing 2.6 μM <sup>13</sup>C, <sup>15</sup>N depleted LctA and 5 mM ATP in the buffer described above. The 200 μL reactions were quenched at the following time points by the addition of 5 μL TFA: 1 s, 3 s, 10 s, 15 s, 25 s, 35 s, 50 s, and 2 min. Each

fraction was run on the 8.5 T Q-FTMS. Figure S3 illustrates the quadrupole enhanced regions of the spectra containing the 7+ charge states. After 50 ms no masses were seen corresponding to any dehydration events. The same was also observed for the 500 ms time point (data not shown). A 3 s time point revealed all five species including those with 1, 2 and 3 dehydrations. The 10 s and 35 s time points show an increasing amount of product (-4 H<sub>2</sub>O) and in both cases a species corresponding to 3 dehydrations. After 2 min, no amount of starting material remained and only a species with four dehydrations was observed.

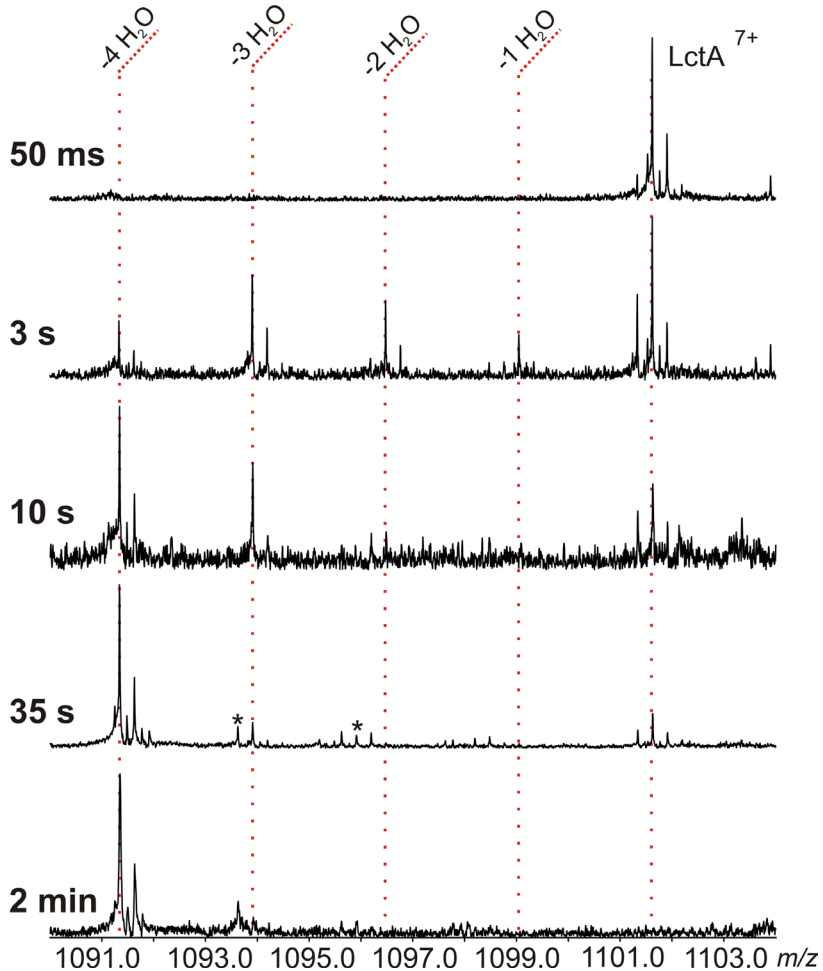

**Figure S3.** Time course with an enzyme to substrate ratio of 1:1. The region shown contains the 7+ ions for all possible forms of LctA. An \* denotes an oxidation product.

#### *1:90 Enzyme to Substrate*

A series of time points was performed at an enzyme to substrate ratio of 1:90. His<sub>6</sub>-LctM was added to a final concentration of 0.13 μM to a reaction mixture containing 11 μM <sup>13</sup>C, <sup>15</sup>N depleted LctA and 0.5 mM ATP. The reactions were quenched at the following time points by filtering through a 0.45 μm membrane into 5 μL TFA: 15 s, 45 s, 75 s and 5 min. A control reaction was also done in the same manner as above, except it contained no ATP. Figure S4 shows the quadrupole enhanced regions of the spectra containing the 8+ charge states for all possible forms of LctA for all the time points. After 15 s only a small amount of products appear with three and four

dehydrations. At 45 s more of the material has been converted to a species with a mass consistent with four dehydrations with a small amount of material present with both two and three dehydrations. A similar spectrum is seen after 75 s with a larger amount of material with four dehydrations. After 5 min almost all of the starting material is consumed with the majority of material having a mass consistent with four dehydrations. Small amounts of three and two dehydrations are also seen.

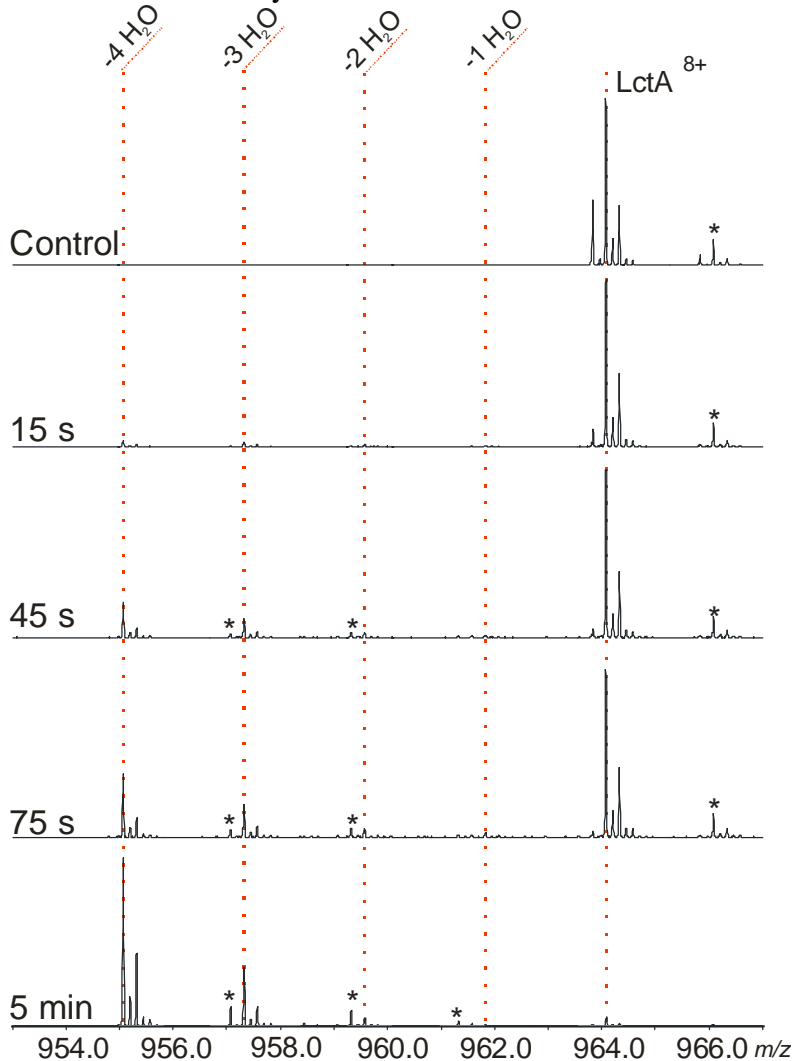

**Figure S4. Time course with an enzyme to substrate ratio of 1:90. An \* denotes an oxidation.**

#### *1:900 Enzyme to Substrate*

A series of time points was done at an enzyme to substrate ratio of 1:900. His<sub>6</sub>-LctM was added to a final concentration of 0.013  $\mu\text{M}$  to a reaction mixture containing 11  $\mu\text{M}$  <sup>13</sup>C, <sup>15</sup>N depleted LctA and 0.5 mM ATP. The reactions were quenched at the following time points by filtering through a 0.45  $\mu\text{m}$  membrane into 5  $\mu\text{L}$  TFA: 1 min, 3 min, 5 min, 7.5 min, 10 min, 20 min and 40 min. A control reaction, without ATP, was also done at the same enzyme to substrate ratio. Selected time points are shown in Figure 1 of the main article.

## Cyanylation of Time Points

A series of time-limited assays of His<sub>6</sub>-LctA with His<sub>6</sub>-LctM were undertaken and the assay products purified by C4 analytical HPLC. The purified assay products were resuspended in 20  $\mu$ L of 2.5 mM TCEP, 4 M Gn-HCl in 100 mM citric acid buffer pH 3.0 by vortexing, followed by incubation at 37  $^{\circ}$ C for 15 min, to minimize the occurrence of disulfides that would prevent cyanylation of non-cyclized thiols. The reduced assay products were then subjected to cyanylation with 20  $\mu$ L of 200 mM 1-cyano-4-dimethylaminopyridinium tetrafluoroborate (CDAP) in 100 mM citric acid, pH 3.0 for 15 min at 37  $^{\circ}$ C.<sup>5</sup> At the end of incubation the samples were acidified with 3  $\mu$ L of 5% TFA and purified by C18 ZipTip prior to analysis by ESI-FTMS. As a control, His<sub>6</sub>-LctA was subjected to identical conditions and the results of cyanylation are as shown in Figure S5.

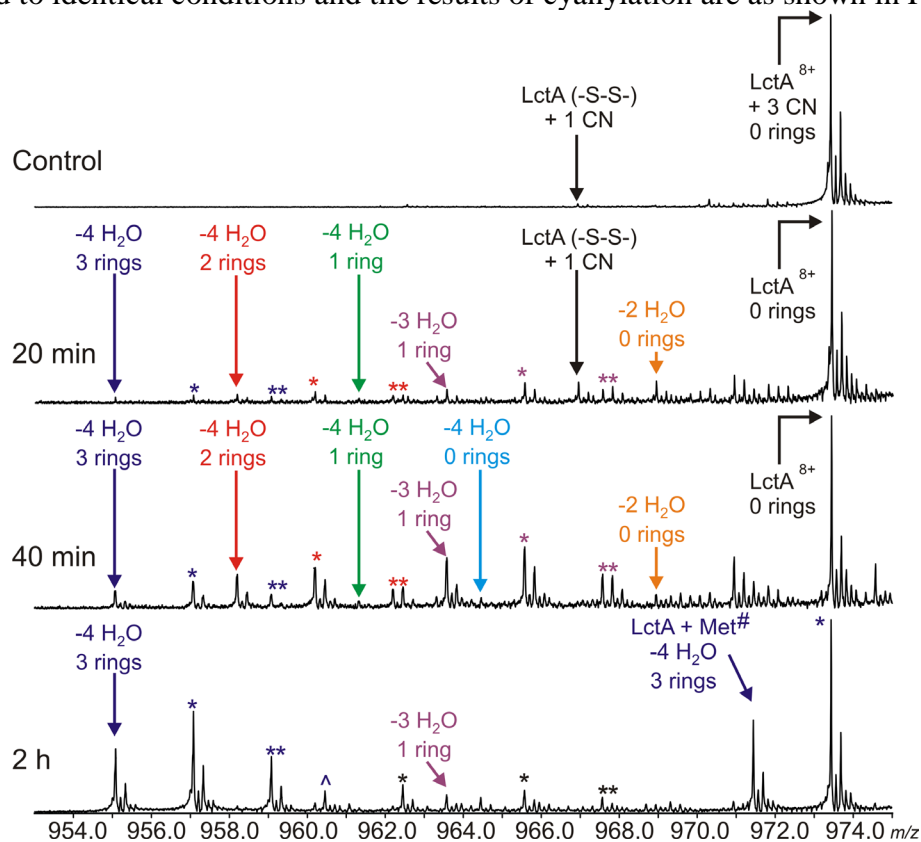

**Figure S5.** Cyanylation of different time points of 1:900 enzyme to substrate ratio (2 h time point is an enzyme to substrate ratio of 1:90). All species shown are the 8+ ions. An \* denotes one oxidation, \*\* two oxidations and ^ carbamylation. An # denotes a peak arising from incomplete removal of N-terminal Met.

## MS/MS of the Starting Material and Product

Both a control experiment and a 2 h time point with an enzyme:substrate ratio of 1:90 were fragmented via IRMPD to determine the presence or absence of the lanthionine rings. It has previously been shown that the regions that are cyclized will not undergo fragmentation.<sup>1</sup> Figure S6A shows the control spectrum, where the starting material was isolated and fragmented. The inset represents the fragment ions generated via IRMPD.

Fourteen b-type and 5 y-type fragment ions were observed, with many of those being in the region which is expected to be cyclized in the presence of LctM. In figure S6B, a spectrum is shown in which the LctA has been converted to product. The inset is the fragment ion map of ions from IRMPD of the species with four dehydrations. Eleven b-type and 19 y-type fragment ions were observed, but none were observed in the region containing the lanthionine rings indicating that LctA had been fully dehydrated and cyclized in 2 h.

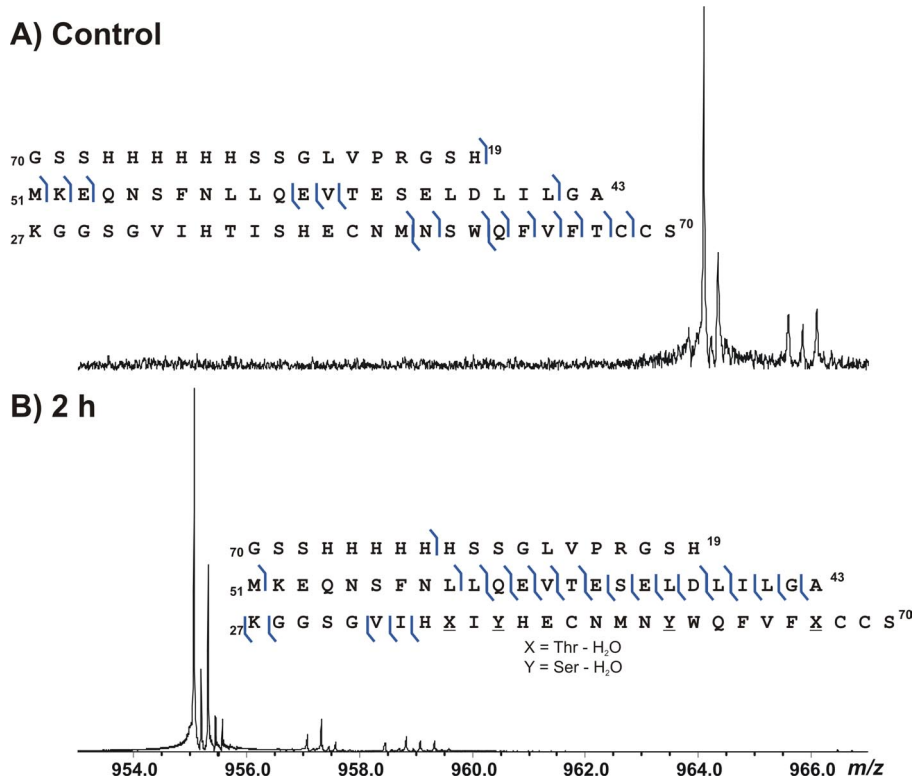

**Figure S6.** A) A control sample in which the starting material has not undergone any processing. Inset, IRMPD fragment ion map of the starting material. B) Spectrum containing a species with four dehydrations. Inset, fragment ion map of depleted LctA after being treated with LctM (1:90 enzyme to substrate) for 2 h. The data are consistent with formation of all 3 lanthionine rings.

## References

1. Xie, L.; Miller, L. M.; Chatterjee, C.; Averin, O.; Kelleher, N. L.; van der Donk, W. A. *Science* **2004**, 303, 679-681.
2. Dorrestein, P. C.; Zhai, H.; McLafferty, F. W.; Begley, T. P. *Chem. Biol.* **2004**, 11, 1373-1381.
3. Patrie, S. M.; Charlebois, J. P.; Whipple, D.; Kelleher, N. L.; Hendrickson, C. L.; Quinn, J. P.; Marshall, A. G.; Mukhopadhyay, B. *J. Am. Soc. Mass Spectrom.* **2004**, 15, 1099-1108.
4. Little, D. P.; Speir, J. P.; Senko, M. W.; O'Connor, P. B.; McLafferty, F. W., *Anal. Chem.* **1994**, 66, 2809-2815.
5. Wu, J.; Watson, J. T. *Prot. Sci.* **1997**, 6, 391-398.
